# Supplementary material
Source: PubMed Central journal article supplement (PMC5223738)
Supplement: 10-1055-s-0042-110400-sup_gf1079.pdf [file 10-1055-s-0042-110400-sup_gf1079.pdf]

# Replik zu: Dittrich et al.: Embryonenerhaltende Gewinnung pluripotenter Stammzellen – übersehene strafrechtliche Verbote, berufsrechtliche Konsequenzen und patentrechtliche Inkonsistenzen

Response to: Dittrich et al.: Non-Embryo-Destructive Extraction of Pluripotent Embryonic Stem Cells – Overlooked Legal Prohibitions, Professional Legal Consequences and Inconsistencies in Patent Law

## Autoren

T. Faltus<sup>1</sup>, U. Storz<sup>2</sup>

## Institute

<sup>1</sup> Juristische und Wirtschaftswissenschaftliche Fakultät, Martin-Luther-Universität Halle-Wittenberg, Halle, Germany  
<sup>2</sup> Michalski · Hüttermann & Partner Patentanwälte, Düsseldorf

## Schlüsselwörter

- Stammzellgewinnung
- embryonenerhaltend
- Präimplantationsdiagnostik (PID)
- Stammzellenpatent

## Key words

- stem cell extraction
- non-embryo-destructive
- pre-implantation genetic diagnosis (PID)
- stem cell patent

## Zusammenfassung

Die Veröffentlichung von Dittrich et al. „Embryonenerhaltende Gewinnung pluripotenter Stammzellen: Implikationen für die regenerative Medizin und die Reproduktionsmedizin“ Geburtshilfe und Frauenheilkunde 2015; 75: 1239–1242 [1] stellt die Möglichkeiten dar, die sich durch die embryoerhaltende Gewinnung embryonaler Stammzellen aus menschlichen Blastozysten ergeben können. Die Durchführung der Methode ist jedoch rechtlich und ethisch problematischer als von den Autoren dargestellt und in Deutschland rechtlich verboten. Das von Dittrich et al. erwähnte deutsche Patent DE 10 2004 062 184 zur embryoerhaltenden Gewinnung von Stammzellen steht im Widerspruch zur höherrangigen Rechtsprechung des Europäischen Gerichtshofs. Schließlich ist die von Dittrich et al. vorgeschlagene embryoerhaltende Gewinnung von Stammzellen zu Zwecken der Asservierung dieser Zellen für eventuelle Therapieverwendungen in Deutschland strafbeschwert verboten.

## Abstract

The publication of “Non-embryo-destructive Extraction of Pluripotent Embryonic Stem Cells: Implications for Regenerative Medicine and Reproductive Medicine” by Dittrich et al. in Geburtshilfe und Frauenheilkunde 2015; 75: 1239–1242 [1] describes various possibilities which could result from the non-embryo-destructive extraction of embryonic stem cells from human blastocysts. But implementing this method is more problematic, both legally and ethically, than the authors have represented it to be and is illegal in Germany. German patent DE 10 2004 062 184 on the non-embryo-destructive extraction of embryonic stem cells referred to by Dittrich et al. contravenes the higher-ranking case-law of the European Court of Justice. Ultimately, the non-embryo-destructive harvesting of embryonic stem cells with the aim of storing these cells for use in potential therapies as proposed by Dittrich et al. is prohibited in Germany and could lead to criminal prosecution.

eingereicht 13.4.2016  
 revidiert 30.5.2016  
 akzeptiert 13.6.2016

## Bibliografie

DOI <http://dx.doi.org/10.1055/s-0042-110400>  
 Geburtsh Frauenheilk 2016; 76: 1–7 © Georg Thieme Verlag KG  
 Stuttgart · New York ·  
 ISSN 0016-5751

## Korrespondenzadresse

**Dr. Timo Faltus,**  
**Dipl.-Jur., Dipl.-Biol.**  
 Juristische und Wirtschaftswissenschaftliche Fakultät  
 Martin-Luther-Universität  
 Halle-Wittenberg  
 Universitätsplatz 3–5  
 06108 Halle  
 timo.faltus@jura.uni-halle.de

## Einleitung

Humane embryonale Stammzellen erfahren in der Forschung Interesse für die Entwicklung neuer regenerativmedizinischer Therapien. Allerdings wird, hier am Beispiel für Deutschland gezeigt, selbst frühen Embryonen, die für die Stammzellengewinnung benötigt werden, von verschiedenen Seiten her der grundgesetzlich gesicherte Schutz der Menschenwürde und der Schutz der körperlichen Unversehrtheit zuerkannt. Die Gewinnung und Verwendung humaner embryonaler Stammzellen beschäftigt daher seit deren ersten Gewinnung und Kultivierung [2] sowohl den medizinisch-naturwissenschaftlichen als auch ethischen und rechtlichen Diskurs. Kern dieser Diskussionen war und ist der mora-

lische und der damit verbundene rechtliche Status menschlicher Embryonen im Blastozystenstadium. Hier stehen sich im Wesentlichen zwei Positionen gegenüber. Zum einen wird vertreten, dass mit der befruchteten Eizelle, spätestens mit dem Verschmelzen des mütterlichen und väterlichen Kerns, eine Entität mit eigenem moralischen und rechtlichen Wert entstanden ist, wobei dieser Wert dem eines (geborenen) Menschen entspricht, sodass alle Entwicklungsphasen ab dieser Verschmelzung auch rechtlich wie geborene Menschen gegen fremdbestimmte und fremdnützige, weil nicht dem Embryo dienend, Zerstörung oder Verzwecklichung geschützt werden (siehe dazu mit weiteren Nachweisen [3,4]). Zum anderen wird davon ausgegangen, dass der Moment der Entstehung dieses eigenständigen mora-

lischen und rechtlichen Wertes erst später in der Embryonalentwicklung eintritt, wobei hier verschiedene Zeitpunkte wie beispielsweise die Bildung erster neuronaler (Vorläufer-)Zellen genannt werden (siehe dazu mit weiteren Nachweisen [5, 6]). Folge der Ansichten, die hinsichtlich der Entstehung der Rechtspersönlichkeit nicht schon auf die Verschmelzung der Vorkerne abstellen, kann damit sein, dass humane Embryonen, z. B. im Blastozystenstadium, auch für fremdnützige Zwecke zerstörend verwendet werden können, sofern diese Verwendung in einem Zeitpunkt erfolgt, in dem der Embryo noch keine eigene Rechtspersönlichkeit erlangt hat. Im deutschen und zum überwiegenden Teil im kontinentaleuropäischen Verständnis hat sich bislang aber mehrheitlich die Ansicht durchgesetzt und gehalten, dass spätestens mit der Verschmelzung der Vorkerne von Ei- und Samenzelle bei der Befruchtung der Embryo eine eigene Rechtspersönlichkeit mit eigenen (Grund-)Rechten entstanden ist. Nur so ist die Entstehung des deutschen Embryonenschutzgesetzes (ESchG) zu verstehen sowie die unionsrechtlichen Vorgaben zum Patentrecht und die des Europäischen Patentübereinkommens (EPÜ). Folglich ist die embryozerstörende Gewinnung von pluripotenten Stammzellen aus Embryonen in Deutschland verboten (§ 2 Abs. 1 ESchG) und die Patentierung von Erfindungen ausgeschlossen, sofern sie nach der Dogmatik des Europäischen Gerichtshofs (EuGH) wie auch nach der Dogmatik des EPÜ auf Stammzellen beruhen, die – wann auch immer das in der Vergangenheit erfolgte – durch die Zerstörung eines Embryos gewonnen worden sind (EU-Patentrecht [7], EPÜ [8]).

Aufgrund dieser Beschränkungen wurde die sogenannte embryoerhaltende Gewinnung von Stammzellen zunächst als Ausweg aus dem Dilemma gesehen, das sich zwischen dem medizinischen Nutzen embryonaler Stammzellen für neue Therapien und der eigenen Rechtspersönlichkeit des Embryos entfaltet, da der Embryo bei den embryoerhaltenden Verfahren den Eingriff der Stammzellengewinnung (seiner Stammzellen) überstehen soll. Das Verfahren wäre damit auf makroskopischer Ebene der allogenen Zell- und Gewebespende vergleichbar. Diese Betrachtung greift jedoch bei der gegenwärtigen Rechtslage und dem nach wie vor vorherrschenden Verständnis vom moralischen und rechtlichen Status humaner Embryonen in vitro zu kurz. Darauf gehen Dittrich et al. [1] in ihrer Darstellung nicht ein und es kann daher der Eindruck entstehen, die embryoerhaltende Gewinnung von Stammzellen sei – vor allem, wenn man das entsprechend von Dittrich et al. beschriebene und patentierte Verfahren anwendet – rechtlich möglich.

Bevor im Folgenden die Rechtslage in Anbetracht der Auslegung des Embryonenschutzgesetzes sowie der Patentrechtsprechung des EuGH und des EPÜ in Bezug auf die Technik der embryoerhaltenden Gewinnung von Stammzellen dargestellt wird, ist es zum Verständnis der Diskussion zur embryoerhaltenden Verwendung humaner Embryonen notwendig zu verstehen, worauf die Ablehnung auch dieser Form der Stammzellengewinnung aus Blastozysten bestehen kann. Diese kann zum einen darauf beruhen, dass man jede Verwendung humaner Embryonen, die nicht der Herbeiführung einer Schwangerschaft dienen, ablehnt, weil man schon in frühen Embryonen ab der Verschmelzung von Ei- und Samenzelle ein Rechtssubjekt sieht, dessen fremdnützige Verwendung ausgeschlossen ist. Zum anderen kann der Ausschluss, wie hier darzustellen ist, darauf beruhen, dass es sich dabei in Bezug auf das gegenwärtig vorherrschende Verfassungsverständnis und die einfachrechtliche Gesetzeslage sowie in Bezug auf die bisherige Rechtsprechung um die einzig kohärente und konsequente Gesetzesauslegung und -anwendung handelt, ohne

dass es sich dabei um eine Ablehnung dieser Technik lediglich aufgrund der Tatsache, dass humane embryonale Stammzellen verwendet werden, handelt.

## Bedeutung der Technik der embryoerhaltenden Verfahren für den Embryo

▼ Die Charakteristika und die Bedeutung humaner embryonaler Stammzellen für eventuelle medizinische Therapien wurden in der Vergangenheit umfangreich dargestellt, sodass an dieser Stelle auf die entsprechende Literatur verwiesen werden kann [9, 10]. Für die folgenden Betrachtungen haben diese Eigenschaften zudem keine Bedeutung. Hinsichtlich der Technik des von Dittrich et al. [1] beschriebenen Verfahrens ist festzuhalten, dass sich die Autoren hierzu auf ihre frühere Veröffentlichung [11] sowie auf das Patent DE 10 2004 062 184, das von Teilen der Autoren gehalten wird, berufen, wonach der Nachweis, dass das dargestellte und dann auch für menschliche Blastozysten patentierte Verfahren technisch umsetzbar sei, durch entsprechende Versuche im Mausmodell erfolgt sei. Tatsächlich wurden ausweislich der Publikation [11] nach Stammzellasservation aus den Blastozysten gesunde Nachkommen im Mausmodell geboren. Die Autoren verschweigen in ihrer aktuellen Publikation jedoch die Aspekte ihrer früheren Forschung, die rechtlich gegen die Zulassung dieses Verfahrens für menschliche Zellen sprechen. In ihrer aktuellen Publikation entsteht der Eindruck, dass der Erfolg bezüglich der gesunden Nachkommenschaft garantiert sei. Blickt man in die frühere Publikation, ergeben sich für die Übertragung auf humane Embryonen jedoch rechtserhebliche Zweifel. In der Originalpublikation wurden 40 Mausblastozysten biopsiert. Lediglich 24 Blastozysten haben diesen Eingriff überstanden, die dann auf 4 Ammenmäuse übertragen wurden. Eine Ammenmaus gebar daraufhin 2 Nachkommen. Die technische Leistung dieser Arbeit soll hier nicht geschmälert werden, da es – wie die Autoren zurecht schreiben – wesentlich schwieriger ist, embryonale Stammzellen embryoerhaltend aus Blastozysten zu gewinnen als Stammzellen unter Zerstörung von Blastozysten. Die Autoren haben zu dieser Aufgabe eine Lösung gefunden, die im Tiermodell praktikabel ist, die aber in Anbetracht der diesem Verfahren innewohnenden Bestandsgefahren für die Blastozyste bei menschlichen Blastozysten aufgrund des in § 2 Abs. 1 ESchG normierten Verbots nicht angewendet werden darf.

Bemerkenswert ist zudem, dass Dittrich et al. [1] in ihrer aktuellen Publikation, die ca. 10 Jahre jünger ist als die darin diskutierte Patentanmeldung aus dem Jahr 2004 und die Veröffentlichung, auf die sie sich in ihrer aktuellen Publikation und im Patentverfahren berufen, keine neuere Literatur oder Ergebnisse nennen, die eine höhere Erfolgsrate bei der embryoerhaltenden Gewinnung von Stammzellen zeigen würde als in den Schriften von vor 10 und mehr Jahren. Warum? Diese Feststellung geht einher mit der Beobachtung, dass die embryoerhaltende Gewinnung von Stammzellen – zumindest in Bezug auf humane Embryonen – auch in anderen Rechtskreisen keine Rolle zu spielen scheint. Eine Recherche über PubMed, selbst mit den von Dittrich et al. [1] genutzten Keywords, bringt keine nennenswerten Veröffentlichungen entsprechender Forschungsbemühungen.

### **PID an totipotenten Stammzellen aus embryoerhaltender Gewinnung**

Die PID unter Biopsie und Untersuchung totipotenter Zellen (im Morulastadium) ist ausnahmslos und unabhängig von erhaltenem oder zerstörendem Einfluss auf den „Restembryo“ verboten, weil selbst einzelne, dem multizellulären Embryo im Blastomenstadium entnommene totipotente Zellen nach § 8 Abs. 1 ESchG rechtlich selbst als Embryonen gelten. Daher ist die gezielte Zerstörung einer solchen biopsierten Zelle, wie dies im Rahmen der PID notwendig ist, nach § 2 Abs. 1 ESchG verboten. Im Übrigen wird schon die Abspaltung einer totipotenten Zelle aus einem multizellulären Embryo aufgrund des rechtlich angeordneten Embryonalcharakters der biopsierten Zelle als „eigenständiger“ Embryo durch § 6 Abs. 1 ESchG als verbotenes Klonen angesehen, weil durch die Abspaltung ein anderer, im Vergleich zum Ursprungsembryo erbgleicher Embryo artifizell erzeugt worden ist [12, 13]. Aus den gleichen Gründen ist daher auch die embryoerhaltende Biopsie und Nutzung solcher totipotenter Stammzellen zu Zwecken des Anlegens einer Stammzellenkultur verboten.

### **PID an pluripotenten Stammzellen aus embryoerhaltender Gewinnung**

Da es die Intention der PID ist, (genetische) Informationen über den (Rest-)Embryo zu erhalten, ist es selbstverständlich, dass die Verfahren der PID embryoerhaltend sein müssen. Eine Beschädigung des Restembryos kann sich hier jedoch durch die Verwirklichung des letztlich jeder Technik innewohnenden Restrisikos ergeben oder schlicht durch menschliches Versagen. Die Biopsie von nicht mehr totipotenten Zellen des Embryos zu Zwecken der Untersuchung der gewonnenen Zellen im Rahmen der PID ist jedoch auch nach der letzten Reform [14] des Embryonenschutzgesetzes in Deutschland grundsätzlich verboten (vgl. § 3 a Abs. 1 ESchG). Nur ausnahmsweise ist gemäß § 3 a Abs. 2 ESchG und unter den dort genannten Voraussetzungen eine PID zulässig. Dieser Ausnahmetatbestand ist erfüllt, wenn aufgrund der genetischen Disposition der Frau, von der die Eizelle stammt, oder des Mannes, von dem die Samenzelle stammt, oder von beiden für deren Nachkommen das Risiko einer schwerwiegenden Erbkrankheit besteht oder wenn eine schwerwiegende Schädigung des Embryos, die mit hoher Wahrscheinlichkeit zu einer Tot- oder Fehlgeburt führen wird, festgestellt werden soll. Zusätzliche gesetzliche Bedingungen für die PID sind die Aufklärung und Beratung der Frau vor Durchführung der PID sowie die zustimmende Bewertung einer interdisziplinär zusammengesetzten Ethikkommission. Vor allem muss es Ziel der PID sein, eine Schwangerschaft herbeizuführen und zwar bei der Frau, von der die Eizelle stammt und sofern der Embryo keine genetischen Abweichungen aufweist, die gegen seinen Transfer sprechen. Das Gesetz lässt zwar offen, welche Zellen aus dem Embryo für die PID verwendet werden können, grundsätzlich ist daher sowohl die Trophektodermbiopsie als auch die Biopsie von Zellen der inneren Zellmasse rechtlich möglich. Zudem ist die zerstörende Untersuchung der biopsierten, nicht totipotenten Zellen, zulässig, weil diese Zellen nicht als Embryo gelten, rechtlich nicht eigens geschützt sind und rechtlich wie andere Zell- oder Gewebespenden behandelt werden (so auch [15]). Allerdings hat die jeweilige Gefährdung der beiden vorgenannten Biopsievarianten auf den entwicklungsfähigen Fortbestand des untersuchten Em-

bryos einen entscheidenden Einfluss darauf, welches Verfahren tatsächlich durchgeführt werden darf.

Der Grad der Wahrscheinlichkeit, um bei der PID von einem sicheren Verfahren in Bezug auf die Erhaltung des betroffenen Embryos sprechen zu können, wird in der Literatur weniger diskutiert als die Einführung der Verfahren als solches. Auch Dittrich et al. [1] gehen entgegen der hierzu typischerweise zu findenden Aufklärungsdokumentationen der niedergelassenen Ärzte nicht darauf ein, dass der Embryo durch die Biopsie seine weitere Entwicklungsfähigkeit verlieren kann. Stattdessen stellen Dittrich et al. [1] auf die eventuell genaueren Ergebnisse der Untersuchung von Zellen der inneren Zellmasse ab, die mit dem von ihnen beschriebenen embryoerhaltenden Verfahren biopsiert worden sind, im Vergleich zur Trophektodermbiopsie, bei der es sich zwar auch um ein embryoerhaltendes Verfahren handelt, das aber eine andere Bestandsgefährdung für den Embryo darstellt. Die Information und die Aufklärung hinsichtlich der unterschiedlichen Bestandsgefährdungen ist aber wesentlich für den untersuchenden Arzt, für die betroffenen Elternpaare und ggf. auch für die Ethikkommissionen, die nach § 3 a ESchG iVm. der Präimplantationsdiagnostikverordnung (PIDV) über einen Antrag auf Durchführung einer PID entscheiden müssen, weil erst diese Angabe – zusammen mit der Qualität der Testergebnisse – jedenfalls die betroffenen potenziellen Eltern in die Lage versetzt zu entscheiden, ob eine PID im konkreten Fall durchgeführt wird.

### **Gewinnung und Asservierung pluripotenter Stammzellen mittels embryoerhaltender Verfahren**

Die embryoerhaltende Gewinnung von pluripotenten Stammzellen aus der inneren Zellmasse zu Zwecken der Asservierung dieser Stammzellen ist in Deutschland strafbeschwert verboten; auch nach dem von Dittrich et al. [1] beschriebenen Verfahren. Diese Verfahren sind nicht zulässig, da sie nicht der Erhaltung des Embryos dienen. Dies gilt auch für die sogenannten embryoerhaltenden Verfahren, da sie letztlich immer ein Restrisiko für die Zerstörung des Embryos bergen und da der Embryo durch die Biopsie zudem keinen Nutzen für seine weitere Entwicklung hat. Das Embryonenschutzgesetz erfasst durch § 2 Abs. 1 ESchG als verbotene Einwirkungen auf den in vitro vorliegenden Embryo jedoch schon alle Handlungen, die nicht der Erhaltung des Embryos dienen und ahndet gegensätzliches Verhalten mit Freiheitsstrafe von bis zu 3 Jahren oder mit Geldstrafe. Zudem ist unter Berücksichtigung der typischen Gründe für die Durchführung einer medizinisch assistierten Fortpflanzung nicht ersichtlich, wo der „Markt“ für die embryoerhaltende Gewinnung von Stammzellen nach dem von Dittrich et al. [1] beschriebenen Verfahren sein soll. Wird eine PID durchgeführt und festgestellt, dass im Embryo eine schwerwiegende Schädigung, die mit hoher Wahrscheinlichkeit zu einer Tot- oder Fehlgeburt führen wird, vorliegt, dann wird der betroffene Embryo verworfen. Von einer Asservierung von Stammzellen unter Erhaltung und Transfer des Embryos ist hier nicht auszugehen, da für die Krankheiten, die im Rahmen der PID detektiert werden, selbst unter Verwendung der asservierten Zellen auf absehbare Zeit keine Therapie möglich sein wird. Das von Dittrich et al. [1] erwähnte Verfahren der „präimplantativen Therapie“ ist, wie die Autoren selbst schreiben, ein „Vorgriff auf die Zukunft“, wobei hier ergänzt sein soll: ein Vorgriff auf eine unbestimmte und selbst unter Berücksichtigung der Geschwindigkeit des medizinischen Fortschritts wahrscheinlich ein Vorgriff auf eine weit entfernte

Zukunft, die keinem Embryo zugutekäme, der heute oder in absehbarer Zeit seine Stammzellen abservieren lassen würde. Vielmehr ist das Ziel der PID aufgrund der Komplexität genetisch bedingter Erkrankungen, nur solche Embryonen zu transferieren, die keine solchen genetischen Defekte aufweisen, die eine schwerwiegenden Schädigungen, die mit hoher Wahrscheinlichkeit zu einer Tot- oder Fehlgeburt führen würden, aufweisen. Im Übrigen wäre es im Anschluss an die PID bislang verboten, aus dem aufgrund der festgestellten genetischen Abweichungen nicht transferierten Embryo Stammzellen unter Zerstörung des Embryos zu gewinnen, selbst dann, wenn damit Zelllinien erzeugt werden sollen, die zur Erforschung der genetischen Krankheitsursachen verwendet werden sollen, wegen der der betreffende Embryo nicht transferiert wird. Grund hierfür ist, dass auch solche Embryonen, so lange sie im Sinne des Embryonenschutzgesetzes als entwicklungsfähig gelten, Embryonen im Sinne von § 8 Abs. 1 ESchG sind, die nicht zielgerichtet zu fremdnützigen Zwecken wie der Stammzellengewinnung zerstört werden dürfen. Möglich ist hier nur, die betreffenden Embryonen so lange „stehen zu lassen“ bis sie nicht mehr entwicklungsfähig sind, da sie dann nicht mehr als Embryonen im Sinne des Embryonenschutzgesetzes gelten [16,17]. Allerdings dürften dann die Stammzellengewinnung qualitativ vereitelt sein.

Geht man davon aus, dass keine PID erfolgt, sondern „lediglich“ eine medizinisch assistierte Fortpflanzung, ist kaum davon auszugehen, dass die betroffenen Paare bei korrekter Aufklärung dem Eingriff der sogenannten embryoerhaltenden Stammzellengewinnung aus der inneren Zellmasse zustimmen werden. Der Grund liegt darin, dass der Arzt wie oben dargestellt immer auch über die Bestandsgefahren für den Embryo aufklären müsste. Er müsste gegenwärtig und unter Bezugnahme auf die Veröffentlichung von Dittrich et al. [1] darauf verweisen, dass wie in Tiermodellen gezeigt, wahrscheinlich in 40% der Fälle der Embryo den Eingriff nicht überstehen wird. Selbst wenn das Verfahren hinsichtlich Erfolgsquote und damit der Bestandsgefährdung verbessert wird, wird ein technisches Verfahren immer ein Restrisiko haben, sei dies in der Technik selbst verkörpert oder in menschlichem Fehlverhalten. Daher kann und darf der Arzt im Rahmen der Aufklärung nicht eine 100%-Erfolgsquote der embryoerhaltenden Stammzellengewinnung versprechen, sondern ist verpflichtet, mit realistischen Werten aufzuklären. Wenn man dann noch die zur Verfügung stehende (limitierte) Anzahl an Embryonen eines Paares bei der In-vitro-Fertilisation berücksichtigt, die Erfolgsrate der medizinisch assistierten Fortpflanzungsbehandlung selbst ohne Eingriffe in den dabei erzeugten Embryo von ca. 15% pro IvF-Zyklus berücksichtigt [18] sowie die Lebenssituation der Paare, die eine medizinisch assistierte Fortpflanzungsbehandlung in Anspruch nehmen, ist nicht davon auszugehen, dass diese Paare einem solchen Eingriff zustimmen würden, der zudem keinen unmittelbaren Nutzen für diesen Embryo hat, der aber mit (zusätzlichen) Gefahren für eine erfolgreiche Schwangerschaft verbunden ist. Ohne hier eine Entscheidung über die Qualität verschiedener Stammzelltypen für deren jeweilige therapeutische Verwendung treffen zu wollen, muss man auch bedenken, dass die Asservierung von Nabelschnurstammzellen oder die Erzeugung von iPS-Zellen wesentlich weniger invasiv und bestandsgefährdend für den Embryo sind als die sogenannten Verfahren embryoerhaltender Stammzellengewinnung aus einer Blastozyste. Dazu kommt noch, dass die Anwendung der biopsierten Zellen ungewiss ist, sodass der Embryo einem Bestandsrisiko ausgesetzt wird, das vermutlich in keinem akzeptablen Verhältnis zu dem eventuellen Nutzen für den spä-

ter geborenen Menschen stehen würde, der einzig durch die biopsierten und dann asservierten Zellen erreicht wird. Auch über diese Zusammenhänge müsste der Arzt vor Durchführung der PID aufklären, da diese Aspekte für die Entscheidung der betroffenen Paare wesentlich sind.

Es kann letztlich auch dahinstehen, ob ein schmales Fenster einer rechtlich zulässigen embryoerhaltenden Stammzellengewinnung aus der inneren Zellmasse für Therapie Zwecke zugunsten des biopsierten Embryos besteht. Es hat mehr den Eindruck, dass solche „Therapien“ eher (rechts-)theoretischer Natur sind, da hierfür sichergestellt sein müsste, dass die biopsierten Zellen dazu verwendet werden müssten, um den Embryo, von dem sie biopsiert worden sind, zu therapieren. Sind solche Therapien verfügbar? Man wird hier stattdessen davon auszugehen haben, dass ein Embryo, bei dem im Rahmen einer PID eine entsprechende schwerwiegende genetische Abweichung festgestellt wird, deren Auswirkungen sich theoretisch mit seinen Stammzellen therapieren lassen könnten, schlicht nicht transferiert wird, sodass die Therapieoption an solche nicht besteht.

### Patentierung der embryoerhaltenden Gewinnung pluripotenter Stammzellen

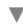

Das von Dittrich et al. [1] erwähnte und von Teilen der Autoren gehaltene Patent DE 10 2004 062 184 zur embryoerhaltenden Gewinnung von Stammzellen steht im Widerspruch zur höherrangigen Rechtsprechung des EuGH. Das beschriebene deutsche Patent muss an den Patenterteilungs- und Patentausschlussgründen der §§ 1 a, 2 PatG gemessen werden, die zum einen unter anderem die Patentierung von Erfindungen auf Grundlage von Stoffen menschlicher Herkunft regeln und die zum anderen der Umsetzung höherrangigen Richtlinienrechts der Europäischen Union dienen. Konkret handelt es sich dabei um die Umsetzung der Biopatentrichtlinie 98/44/EG. Aufgrund dieses Abhängigkeitsverhältnisses der hier einschlägigen deutschen Normen von der normsystematisch höherrangigen Biopatentrichtlinie muss sich die Auslegung und Anwendung dieser deutschen Normen an der entsprechenden Auslegung des höherrangigen Unionsrecht orientieren. Insoweit ist dann z.B. die Rechtsprechung des EuGH auch von deutschen (Patent-)Behörden zu beachten, wenn diese Behörden deutsche Normen des Patentgesetzes mit unionsrechtlichem Ursprung anwenden (zu dieser Pflicht deutscher Behörden allgemein [19,20]).

Der EuGH hat für das durch die Biopatentrichtlinie unionsrechtlich geprägte Biopatentrecht jedenfalls im Rahmen des sogenannten Brüstle-Urteils und des Parthenoten-Urteils entschieden, dass Techniken unter Verwendung humaner embryonaler Stammzellen nicht patentierbar sind, wenn diese auf der Zerstörung oder lediglich der Verwendung entwicklungsfähiger Embryonen basieren, weil der EuGH solchen Embryonen letztlich aus dem unionalen Verfassungsrecht abgeleitete eigene Rechte zuerkennt, die diese Embryonen gegen Zerstörung oder sonstige Ver zwecklichung schützen sollen [7,21]. Für den Patentausschluss kommt es zudem nicht darauf an, ob die Gewinnung der Embryonen in der Patentschrift überhaupt erwähnt wird, da die Zerstörung bzw. Verwendung als solche als rechtlich missbilligt angesehen werden und sich daher ggf. auch auf die abhängigen Folgeprodukte und Verfahren auswirken. Dadurch soll ausgeschlossen werden, dass durch eine entsprechend geschickt formulierte Abfassung der Patentschrift die an sich rechtlich missbilligte Zerstörung bzw. Verwendung humaner Embryonen um-

gangen wird [22]. Die Patentierbarkeit solcher Erfindungen würde die vom Gesetzgeber nicht gewollte Instrumentalisierung und kommerzielle Verwendung des Menschen bedeuten. Eine solche von fremden Zwecken (fremd, weil der Embryo, aus dem die Zellen gewonnen werden, selbst nicht davon profitiert, sondern nur andere) geleitete Zerstörung oder Verwendung humaner Embryonen hat der EuGH im Patentrecht als unvereinbar mit dem in Art. 6 BiopatentRL normierten unionsrechtlichen *Ordre public* gewertet und die Patentierbarkeit entsprechender Erfindungen verneint. Dabei unterscheidet der EuGH zwar zunächst zwischen „Zerstörung“ und „Verwendung“ von Embryonen, sodass offensichtlich ein Unterschied zwischen Embryozerstörung und Embryo**verwendung** existiert. Eine „ledigliche“ Embryo**verwendung** zu Zwecken der Stammzellengewinnung muss daher nicht notwendigerweise auch eine Embryozerstörung sein, die ebenfalls zur Stammzellengewinnung genutzt werden kann. Der EuGH hat jedoch beide Formen rechtlich gleichbehandelt und sieht in beiden Formen einen Verstoß gegen den unionsrechtlichen *Ordre public* [7]. Daher ist auch die embryoerhaltende Gewinnung von Stammzellen im Patentrecht letztlich nichts anderes als eine mit dem unionsrechtlichen *Ordre public* unvereinbare Einwirkung auf menschliche Embryonen, die dazu führt, das Erfindungen, die auf derart gewonnenen Stammzellen beruhen, unabhängig davon, ob die Art und Weise der Gewinnung in der Patentschrift erwähnt wird, nach der Biopatentrichtlinie und damit auch nach deutschem Patentgesetz nicht patentfähig sind. Schon diesen Zusammenhang hat das DPMA verkannt und daher in materiell-rechtlich zu beanstandender Weise das von Dittrich et al. [1] genannte Patent rechtswidrig erteilt.

Zudem kann auch aus der Rechtsprechung des BGH auf Grundlage der Brüstle-Entscheidung, die auf Vorlage des BGH an den EuGH ergangen war [23], nicht abgeleitet werden, dass solche Techniken zur Stammzellengewinnung patentierbar seien, die den Embryo erhalten. Das hierbei immer wieder vorgetragene Argument, der BGH hätte solche Techniken als grundsätzlich patentierbar angesehen, ist unzutreffend, da sich der BGH in dem entsprechenden Urteil nicht zu embryoerhaltenden Verfahren geäußert hat, die sich auf Embryonen im Sinne des Patentrechts (und des Embryonenschutzrechts) beziehen. Innerhalb des Urteils des BGH ist zudem nicht nachvollziehbar, warum der BGH nach den Ausführungen zur Gewinnung von „embryonalen“ Stammzellen aus primordialen Keimzellen behauptet, dass es der Zulässigkeit der Patentansprüche nicht entgegenstehe, dass andere Wege zur Gewinnung von embryonalen Stammzellen ohne Zerstörung von menschlichen Embryonen in der Patentschrift nicht aufgezeigt werden. Stattdessen würde die ausführbare Offenbarung eines von mehreren denkbaren Wegen zur Verwirklichung eines „generisch“ beanspruchten Verfahrensschritts genügen, wenn dieser Schritt bei wertender Betrachtung in seiner allgemeinen Bedeutung zur Problemlösung gehört [23]. Die Gewinnung von „embryonalen“ Stammzellen aus primordialen Keimzellen toter Feten oder toter Embryonen im Alter mehrerer Wochen ist jedoch zum einen (technisch) wesentlich verschieden von der embryoerhaltenden Gewinnung embryonaler Stammzellen aus entwicklungsfähigen humanen Embryonen im Blastozystenstadium. Zum andern sind diese Feten bzw. Embryonen tot und daher keine Embryonen im Sinne des Patentrechts. Zudem spielt bei toten Feten bzw. Embryonen die feten- bzw. embryoerhaltende Gewinnung keine Rolle hinsichtlich der weiteren, nicht vorhandenen Entwicklungsfähigkeit. Schon daher kann die Gewinnung von „embryonalen“ Stammzellen aus primordialen Keimzellen nicht als ausführbare Offenbarung eines von

mehreren denkbaren Wegen zur Verwirklichung eines „generisch“ beanspruchten Verfahrensschritts gelten. Das Gleiche gilt daher für das weitere, angeblich embryoerhaltende Verfahren, auf das der BGH eingeht: die Gewinnung embryonaler Stammzellen aus arretierten Embryonen. Ebenso wie die abgegangenen Feten bzw. Embryonen keine Embryonen im Sinne des Patentrechts sind, da ihnen jeweils die Entwicklungsfähigkeit fehlt, sind arretierte Embryonen keine Embryonen im Sinne des Patentrechts, da auch sie nicht entwicklungsfähig sind. Dies führt der BGH sogar aus [23]. Schließlich werden solche arretierten Embryonen typischerweise im Rahmen der Stammzellengewinnung „zerstört“, sodass hierbei noch nicht einmal ein (den toten Embryo) erhaltendes Verfahren vorliegt. Mit anderen Worten: Der BGH hat bei seiner Entscheidung zwar in Erwägung gezogen, dass Verfahren existieren, bei denen Stammzellen aus Entitäten gewonnen werden können, die aus rechtlicher Sicht keine Embryonen darstellen, da sie ihre Entwicklungsfähigkeit verloren haben. Nicht erwogen zu haben scheint der BGH hingegen die erwähnten embryoenerhaltenden Verfahren, bei denen ein Embryo (im Sinne des Patentrechts) zwar nicht zerstört, gleichwohl aber immer noch verwendet wird.

Das vom BGH für zulässig erachtete einschränkende Merkmal in Bezug auf den Patentanspruch (sogenannter Disclaimer) „wobei keine isolierten gereinigten Vorläuferzellen aus humanen embryonalen Stammzellen umfasst sind, bei deren Gewinnung Embryonen zerstört worden sind“ schließt aber entgegen zur an sich hier beachtlichen Rechtsprechung des EuGH diejenigen embryoenerhaltenden Verfahren, die Embryonen zerstörungsfrei für die Stammzellengewinnung verwenden und damit gegen Art. 6 Abs. 2 Buchst. c) RL98/44/EG verstoßen, nicht explizit vom Patentschutz aus. Auch das DPMA hat diesen Zusammenhang bei der Erteilung des von Dittrich et al. [1] erwähnten Patents verkannt. Es ist daher abzuwarten, ob sich dieses Patent gegenüber einer etwaig eingelegten Nichtigkeitsklage, die dann auf die höherrangige Auslegung der RL98/44/EG durch den EuGH einzugehen hat, behaupten kann. Man bedenke hier, dass auch das sogenannte Brüstle-Patent zunächst in Bezug auf humane Stammzellen erteilt worden war, dann aber im Rahmen eines mehrjährigen und mehrinstanziellen Gerichtsverfahrens vom BGH explizit zumindest in Bezug auf Erfindungen, die die Zerstörung humaner Embryonen voraussetzen, für nichtig erklärt worden ist.

Schließlich ist es erstaunlich, dass das von Dittrich et al. [1] erwähnte Patenterteilungsverfahren zunächst zwar darauf eingeht, dass das betreffende deutsche Patent in Deutschland aufgrund der Verbote des Embryonenschutzgesetzes nicht ausgeführt werden darf (siehe dazu oben) [24]. Das DPMA hat sich dann aber im weiteren Verfahrensverlauf fälschlicherweise von dieser Argumentation abbringen lassen [25]. Die Feststellung der fehlenden Ausführbarkeit aufgrund rechtlicher Hindernisse ist aber wesentlich, da nach § 2 Abs. 1 PatG für Erfindungen, deren gewerbliche Verwertung gegen die öffentliche Ordnung oder die guten Sitten verstoßen würde, keine Patente erteilt werden, auch wenn ein solcher Verstoß nicht allein aus der Tatsache hergeleitet werden kann, dass die Verwertung der konkreten Erfindung durch Gesetz oder Verwaltungsvorschrift verboten ist.

Im Übrigen verschweigen Dittrich et al. [1], dass die auf ihrem deutschen Patent beruhende, korrespondierende Europäische Patentanmeldung EP1674563A1 von der zuständigen Beschwerdekammer des EPO zurückgewiesen worden ist. Zum Verständnis dieses Aspekts ist es wichtig zu wissen, dass aus geschichtlichen Gründen in Europa zwei voneinander unabhängige Patentschutzregime bestehen, die jeweils für sich gleichwertigen

Schutz bieten, und es dem Erfinder frei steht, wessen er sich bedienen möchte: zum einen die nationalen Patentsysteme der einzelnen Staaten der Europäischen Union, die z.T. durch Unionsrecht wie der Biopatentrichtlinie harmonisiert sind, und zum anderen das im Rahmen von Staatsverträgen geschaffene Europäische Patentübereinkommen (EPÜ). Mit der EPÜ-Patentanmeldung wurde zunächst ebenfalls ein Patent für die embryoerhaltende Gewinnung von Stammzellen beantragt, wobei auch humane Blastozysten vom Anspruch umfasst waren. Die Prüfabteilung wies die Anmeldung mit der Begründung zurück, der Gegenstand der eingereichten Ansprüche sei im Hinblick auf Art. 53 a) iVm. Regel 28 c) EPÜ von der Patentierbarkeit ausgeschlossen, da auch die zerstörungsfreie Verwendung menschlicher Embryonen als Ausgangsmaterial in einem Verfahren zur Gewinnung von embryonalen Stammzellen, das gewerbliche Anwendung findet, als „Verwendung zu industriellen oder kommerziellen Zwecken“ im Sinne der Regel 28 c) EPÜ anzusehen sei. Der hiergegen zur Beschwerdekammer des EPA eingelegte Beschwerde wurde letztlich zwar aus formalen Gründen nicht stattgegeben, allerdings äußerte sich die Beschwerdekammer zumindest indirekt im Rahmen zur Frage der Patentierbarkeit solcher Erfindungen.

Die Anmelder versuchten im Beschwerdeverfahren, die Einwände der Prüfabteilung zunächst durch einen Disclaimer, den sie in ihre Ansprüche aufgenommen hatten, zu überkommen. Diesem Disclaimer zufolge sollten die gewonnenen embryonalen Stammzellen keiner industriellen oder kommerziellen Nutzung zugeführt werden, falls die Blastozyste eine menschliche Blastozyste ist. Die zuständige Beschwerdekammer ließ diesen Disclaimer jedoch nicht zu, da er eine zukünftige Nutzung auszuklammern versuchte, die nicht als Verfahrensschritt des beanspruchten Verfahrens angesehen werden konnte und der Disclaimer den eigentlichen Patentanspruch in keiner Weise einschränke. Der Disclaimer verstieß daher gegen Art. 123 Abs. 2 EPÜ und Art. 84 EPÜ, wonach ein eventuell erforderlicher Disclaimer nicht mehr ausschließen sollte, als nötig sei, um den Gegenstand, auszuklammern, der aus nicht technischen Gründen vom Patentschutz ausgeschlossen sei bzw. wonach Patentansprüche deutlich und knapp gefasst sein und von der Beschreibung gestützt werden müssen [26].

Die Beschwerdekammer schließt sich dann im Rahmen der weiteren Begründungen aber noch den Ausführungen der ursprünglichen Prüfabteilung an und führt im Rahmen eines Obiter Dictum aus, dass die Beschwerdekammer in Bezug auf den Anspruch selbst mit Disclaimer wie schon die Prüfungsabteilung in Bezug auf den Anspruch ohne Disclaimer der Auffassung ist, dass der Patentanspruch in Bezug auf humane Blastozysten Gegenstände umfasst, die gegen Art. 53 a) iVm. Verbindung mit Regel 28 c) EPÜ verstoßen, weil die Verwendung von menschlichen Embryonen als Ausgangsmaterial in einem Verfahren zur Gewinnung von embryonalen Stammzellen, das gewerbliche Anwendung findet, als „Verwendung zu industriellen oder kommerziellen Zwecken“ im Sinne der Regel 28 c) EPÜ anzusehen ist und daher nicht mit dem EPÜ vereinbar ist. Die Beschwerdekammer verwies hierbei zudem auf die Rechtsprechung des EuGH im Fall „Brüstle“ [27]. Auch wenn der EuGH die Frage zur embryoerhaltenden Gewinnung von Stammzellen klar und letztinstanzlich beantwortet hat, bleibt ihre endgültige Klärung im Rahmen des Europäischen Patentübereinkommens einem noch einzuleitenden Verfahren vor der Großen Beschwerdekammer überlassen.

## Schlussfolgerung

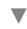

Die embryoerhaltende Gewinnung von Stammzellen ist in Deutschland strafrechtlich verboten. Für den Fortpflanzungsmediziner bestehen daher, sofern er das Verfahren anbietet, erhebliche Strafbarkeitsrisiken, selbst wenn er die Patienten über das Verfahren aufklärt und die Patienten einwilligen. Hinsichtlich des strafrechtlichen Verbots kommt es hierauf nicht an. Solche Verstöße des Arztes können zudem berufsrechtliche Konsequenzen haben, da dann die Zuverlässigkeit des Arztes infrage gestellt werden kann. Das entsprechende deutsche Patent für die embryoerhaltende Stammzellengewinnung unterliegt einem hohen Risiko, in einem Nichtigkeitsverfahren widerrufen zu werden. Wenn embryoerhaltende Verfahren der Stammzellengewinnung von der Gesellschaft gewollt werden, dann geht das rechtskohärent nur mit einer Änderung einfachgesetzlicher Vorschriften. Dass solche Wege sogar in Übereinstimmung mit dem heutigen Verfassungsrecht möglich wären, ist zwar nicht unumstritten, im wissenschaftlichen Diskurs aber bereits mehrfach dargestellt worden (z. B. [5, 6]). Die Beantwortung dieser Frage war nicht Gegenstand dieses Aufsatzes, sondern ist Aufgabe des weiteren wissenschaftlichen Diskurses und letztlich der Politik und des Gesetzgebers.

## Interessenkonflikt

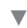

Nein.

## Literatur

- 1 Dittrich R, Beckmann MW, Würfel W. Non-embryo-destructive extraction of pluripotent embryonic stem cells: implications for regenerative medicine and reproductive medicine. *Geburtsh Frauenheilk* 2015; 75: 1239–1242
- 2 Thomson JA, Itskovitz-Eldor J, Shapiro SS et al. Embryonic stem cell lines derived from human blastocysts. *Science* 1998; 282: 1145–1147
- 3 Schmidt-Bleibtreu B, Hofmann H, Henneke HG, Hrsg. Grundgesetz – Kommentar. 13. Aufl. Köln: Carl Heymanns; 2014: Hofmann, Art. 2, Rdnr. 62 ff
- 4 Sachs M. Grundgesetz – Kommentar. 7. Aufl. München: C. H. Beck; 2014: Höfling, Art. 1, Rdnr. 255
- 5 Dreier H, Hrsg. Grundgesetz – Kommentar, Bd. 1. 3. Aufl. Tübingen: Mohr Siebeck; 2013: Dreier, Art. 1 I, Rdnr. 79 ff., 86 ff
- 6 Enders C. Art. 1, Rdnr. 1337. In: Friauf KH, Höfling W, Hrsg. Berliner Kommentar zum Grundgesetz, Stand: 49. Ergänzungslieferung. Berlin: Erich Schmidt Verlag; Februar 2016
- 7 EuGH Rechtssache C-34/10, Urteil vom 18.11.2011, Rdnr. 52
- 8 Entscheidung der Großen Beschwerdekammer, G 2/06 (T 1374/04, Stammzellen/WARF) vom 07.04.2006, Entscheidungsgründe, Rdnr. 15, 25 = GRUR Int 2010; 59: 230–236
- 9 Ilic D, Devito L, Miere C et al. Human embryonic and induced pluripotent stem cells in clinical trials. *Br Med Bull* 2015; 116: 19–27
- 10 Whiting P, Kerby J, Coffey P et al. Progressing a human embryonic stem-cell-based regenerative medicine therapy towards the clinic. *Philos Trans R Soc Lond B Biol Sci* 2015; 370: 20140375
- 11 Dittrich R, Lotz L, Würfel W et al. Offspring after embryo-preserving biopsy of the embryoblast with standard ICSI equipment in mouse blastocysts. *In Vivo* 2011; 25: 935–939
- 12 Günther HL § 6, Rdnr. 3, 9. In: Günther HL, Taupitz J, Kaiser P, Hrsg. Embryonenschutzgesetz – Juristischer Kommentar mit medizinisch-naturwissenschaftlichen Einführungen. 2. Aufl. Stuttgart: Kohlhammer; 2014
- 13 Müller-Terpitz R. § 6 ESchG, Rdnr. 2. In: Spickhoff A, Hrsg. Medizinrecht 2. Aufl. München: C. H. Beck; 2014
- 14 Gesetz zur Regelung der Präimplantationsdiagnostik – Präimplantationsdiagnostik-PräimG. Bundesgesetzblatt 2011, Teil I, Nr. 58 vom 24.11.2011, 2228–2229

- 15 *Wendehorst C.* Art. 43 EGBGB, Rdnr. 30. In: Säcker FJ, Rixecker R, Oetker H, Hrsg. Münchener Kommentar zum Bürgerlichen Gesetzbuch, Bd. 12. 6. Aufl. München: C. H. Beck; 2015
- 16 *Faltus T.* Die Bedeutung des Urteils des Bundesgerichtshofes zur Präimplantationsdiagnostik für die Regenerative Medizin. *Regenerative Medizin* 2011; 4: 32–36
- 17 *Taupitz J.* § 8, Rdnr. 20 ff. In: Günther HL, Taupitz J, Kaiser P, Hrsg. Embryonenschutzgesetz – Juristischer Kommentar mit medizinisch-naturwissenschaftlichen Einführungen. 2. Aufl. Stuttgart: Kohlhammer; 2014
- 18 *Wischmann T.* Einführung Reproduktionsmedizin. 1. Aufl. München: Ernst Reinhardt Verlag; 2012: 80–92
- 19 *Herdegen M.* Europarecht. 17. Aufl. München: C. H. Beck; 2015: § 9, Rdnr. 35, § 10, Rdnr. 1
- 20 *Bieber R.* § 4, Rdnr. 5 ff. In: Bieber R, Epiney A, Haag M, Hrsg. Die Europäische Union – Europarecht und Politik. 11. Aufl. Baden-Baden: Nomos; 2015
- 21 EuGH Rechtssache C-364/13, Urteil vom 18.12.2014, Rdnr. 30, Tenor
- 22 EuGH Rechtssache C-34/10, Urteil vom 18.11.2011, Rdnr. 50
- 23 BGHZ Urteil vom 27. November 2012, Az. X ZR 58/07 = BGH GRUR 2013; 115: 272–275
- 24 Blatt 28 der Patentakte zur Patentanmeldung DE 10 2004 062 184.5 zum später erteilten Patent DE 10 2004 062 184
- 25 Blatt 35, 43 der Patentakte zur Patentanmeldung DE 10 2004 062 184.5 zum später erteilten Patent DE 10 2004 062 184
- 26 Beschwerdekammer des Europäischen Patentamts, Beschwerde-Aktenzeichen T 1836/10-3. 3.08, Entscheidung vom 09.04.2013, Entscheidungsgründe, Rdnr. 9 ff
- 27 Beschwerdekammer des Europäischen Patentamts, Beschwerde-Aktenzeichen T 1836/10-3. 3.08, Entscheidung vom 09.04.2013, Entscheidungsgründe, Rdnr. 10
